# The Role of Host and Microbial Factors in the Pathogenesis of Pneumococcal Bacteraemia Arising from a Single Bacterial Cell Bottleneck

Alice Gerlini<sup>1,9</sup>, Leonarda Colomba<sup>1,9</sup>, Leonardo Furi<sup>1</sup>, Tiziana Braccini<sup>1</sup>, Ana Sousa Manso<sup>1</sup>, Andrea Pammolli<sup>2</sup>, Bo Wang<sup>3</sup>, Antonio Vivi<sup>4</sup>, Maria Tassini<sup>4</sup>, Nico van Rooijen<sup>5</sup>, Gianni Pozzi<sup>1,6</sup>, Susanna Ricci<sup>1</sup>, Peter W. Andrew<sup>7</sup>, Uwe Koedel<sup>8</sup>, E. Richard Moxon<sup>9</sup>, Marco R. Oggioni<sup>1,6,10\*</sup>

**1** LAMMB, Department of Biotechnology, University of Siena, Siena, Italy, **2** Department of Pathophysiology, Experimental Medicine and Public Health, University of Siena, Siena, Italy, **3** Department of Mathematics, University of Leicester, Leicester, United Kingdom, **4** Centro NMR, University of Siena, Siena, Italy, **5** Department of Molecular Cell Biology, Vrije Universiteit Medical Center, Amsterdam, The Netherlands, **6** UOC Batteriologia, Azienda Ospedaliera Universitaria Senese, Siena, Italy, **7** Department of Infection, Immunity and Inflammation, University of Leicester, Leicester, United Kingdom, **8** Department of Neurology, Ludwig-Maximilians University of Munich, München, Germany, **9** Division of Medical Sciences, John Radcliffe Hospital, University of Oxford, Oxford, United Kingdom, **10** Department of Genetics, University of Leicester, Leicester, United Kingdom

## Abstract

The pathogenesis of bacteraemia after challenge with one million pneumococci of three isogenic variants was investigated. Sequential analyses of blood samples indicated that most episodes of bacteraemia were monoclonal events providing compelling evidence for a single bacterial cell bottleneck at the origin of invasive disease. With respect to host determinants, results identified novel properties of splenic macrophages and a role for neutrophils in early clearance of pneumococci. Concerning microbial factors, whole genome sequencing provided genetic evidence for the clonal origin of the bacteraemia and identified SNPs in distinct sub-units of F0/F1 ATPase in the majority of the *ex vivo* isolates. When compared to parental organisms of the inoculum, *ex-vivo* pneumococci with mutant alleles of the F0/F1 ATPase had acquired the capacity to grow at low pH at the cost of the capacity to grow at high pH. Although founded by a single cell, the genotypes of pneumococci in septicaemic mice indicate strong selective pressure for fitness, emphasising the within-host complexity of the pathogenesis of invasive disease.

**Citation:** Gerlini A, Colomba L, Furi L, Braccini T, Manso AS, et al. (2014) The Role of Host and Microbial Factors in the Pathogenesis of Pneumococcal Bacteraemia Arising from a Single Bacterial Cell Bottleneck. *PLoS Pathog* 10(3): e1004026. doi:10.1371/journal.ppat.1004026

**Editor:** Bruce R. Levin, Emory University, United States of America

**Received:** June 7, 2013; **Accepted:** February 10, 2014; **Published:** March 20, 2014

**Copyright:** © 2014 Gerlini et al. This is an open-access article distributed under the terms of the Creative Commons Attribution License, which permits unrestricted use, distribution, and reproduction in any medium, provided the original author and source are credited.

**Funding:** The work was supported in part by the European Commission grants HEALTH-222983 (PNEUMOPATH) and grant from Ricerca Regionale Toscana in Materia di Salute to MRO. The funders had no role in study design, data collection and analysis, decision to publish, or preparation of the manuscript.

**Competing Interests:** The authors have declared that no competing interests exist.

\* E-mail: mro5@leicester.ac.uk

These authors contributed equally to this work.

## Introduction

*Streptococcus pneumoniae*, one of the major human bacterial pathogens, is also part of the normal upper respiratory tract flora, where nasopharyngeal colonisation with one or more strains often lasts weeks to months with seasonal peaks in late winter [1,2]. Carriage of *S. pneumoniae* (pneumococci) may result in disease as the consequence of contiguous spread from the nasopharynx to other sites in the upper or lower respiratory tract causing, for example, otitis media or pneumonia. More rarely, there is hematogenous dissemination of pneumococci resulting in septicaemia and metastatic disease such as meningitis [1,3–5]. In experimental models of pneumococcal infection, the challenge dose required to induce disease is dependent on the route of infection, the genetic background of the host and the virulence of the infecting strain [6] and may vary from a very few to millions of organisms [7]. Following intravenous inoculation of mice with laboratory grown pneumococci, a hallmark of experimental bacteraemic infections is the rapid and efficient clearance of most of the inoculated bacteria [8–10]. In non-immune rodents, major

factors mediating this clearance are splenic macrophages and complement mediated opsonisation [11–14]. A challenge dose of about one million virulent, encapsulated pneumococci is generally needed to induce bacteraemia in about half of challenged animals (the effective dose or ED<sub>50</sub>) and which is the dose generally used to address investigations into the early events shaping an infectious process.

Most work on the pathogenesis of infectious disease focuses on specific virulence determinants which are generally presented as the cause, either alone or in combination with other factors, of the events leading to the infection of the host where the microbial population is considered to be a uniform entity. However, several investigations have addressed the within host population dynamics, especially on the early phases of host-pathogen interactions [15]. There are different models which address these early events that include: (i) the model of independent action, which postulates that at the LD<sub>50</sub> (lethal dose for 50% for the hosts) the hosts develop infection “following the multiplication of only one of the inoculated bacteria, regardless of the total number of bacteria inoculated” [16], (ii) the hypothesis of synergy which “postulates

## Author Summary

Decades of research on bacterial sepsis have been devoted to analysing the steps that lead from a local event, either carriage or a localised infection, to systemic disease. Our work analyses in depth the events determining systemic infection by one of the main human pathogens, *Streptococcus pneumoniae*. Consistent with similar findings on the pathogenesis of bacteraemia due to other commensal pathogens, our results show that after an intravenous inoculum of a million pneumococci, the resulting septicaemia is often founded by a single bacterial cell. Investigation into the nature of this monoclonal infection identified strong within-host selective pressure for metabolic fitness during outgrowth of the bacterial population.

that inoculated bacteria co-operate and that fatal infections will be initiated by more than one bacterium and that this will lead to the predominance of several variants” [16], and models which introduce time as a factor into the process and propose a two-stage model where a birth–death phase would be responsible for generation of the heterogeneity within the population later during the infection [17].

Both for viral and bacterial infections it has been shown that the effective number of infectious agents which actually start the disease is generally many orders of magnitude below the actual dose used for challenge [16,16,18–21]. In particular a series of reports, generally based on experimental challenge using an inoculum containing an approximately equal mixture of two isogenic variants at the LD50, has shown experimentally that systemic infections may be initiated by the multiplication of as few as a single organism [22–27]. Models differ widely, and due to the nature of pathogenesis of many infections, they rely on experimental challenge at a site different to that investigated for disease

implying that multiple bottlenecks occur and that potentially a series of invasive events could be enucleated [16,18–27]. We here have investigated the host and microbial determinants that underpin the occurrence of the single cell bottleneck in the pathogenesis of pneumococcal septicaemia following inoculation of mice with three isogenic variants by the intravenous route. This route has an advantage over other experimental infection models as there are less biological events between the initial challenge and full blown disease so that rigorous analysis of the events is facilitated.

## Results

### The population of pneumococci in the blood is clonal within hours of inoculation

CD1 mice were inoculated intravenously (i.v.) with a mixture of pneumococci comprising approximately equal numbers of each of three isogenic TIGR4 mutants (FP122, FP321 and FP318) with different resistance markers (Table 1) [28]. Following inoculation, blood samples were collected at different times and spread on selective plates. Colony counts allowed quantitation of the distribution of the different mutants making up the pneumococcal population in the blood (Figure 1). Two hours after bacterial challenge, blood samples from all mice, with one exception, grew all three of the variants that had been included in the challenge dose. Samples of the second group of mice, sampled one hour thereafter, showed a mixed population of the variants: two in 6 mice, three in 17 mice and one mouse had negative blood culture (Figure 1A). At 7 h after challenge, this pattern was distinctly different: there were 10 positive and 2 negative blood cultures and the numbers of bacteria were significantly reduced. At 8–9 h post-infection, most blood cultures (25/29 mice) were negative. The remaining 4 mice had monoclonal blood cultures in that each grew colonies of only one mutant (Figure 1A). In the subsequent hours of infection, bacteria were detected in the blood at high

**Table 1.** Pneumococcal strains.

| Strain | Background | Type  | Comment                                 | Reference               |
|--------|------------|-------|-----------------------------------------|-------------------------|
| D39    | wt         | 2     |                                         | [62]                    |
| DP1004 | D39        | rough | Un-encapsulated, streptomycin resistant | [51]                    |
| G54    | wt         | 19F   | erythromycin and tetracycline resistant | [50]                    |
| TIGR4  | wt         | 4     |                                         | [63]                    |
| FP122  | TIGR4      | 4     | <i>zmpC::ermB</i>                       | [28,48]                 |
| FP318  | TIGR4      | 4     | <i>zmpC::aad9</i>                       | this work               |
| FP321  | TIGR4      | 4     | <i>zmpC::aphIII</i>                     | this work               |
| FP335  | D39        | 2     | <i>bglA::aad9</i>                       | gift of Hasan Yesilkaya |
| FP487  | FP318      | 4     | SP1507 <i>atpC</i> mutant*              | this work               |
| FP489  | FP321      | 4     | SP1508 <i>atpD</i> mutant*              | this work               |
| FP490  | FP321      | 4     | SP1513 <i>atpB</i> mutant*              | this work               |
| FP498  | FP321      | 4     | SP1508 <i>atpD</i> mutant*              | this work               |
| FP499  | DP1004     | Rough | SP1507 <i>atpC</i> mutant*              | this work               |
| FP500  | DP1004     | Rough | SP1507 <i>atpC</i> mutant*              | this work               |
| FP503  | FP321      | 4     | SP1510 <i>atpA</i> mutant*              | this work               |
| FP504  | FP321      | 4     | SP1510 <i>atpA</i> mutant*              | this work               |
| FP505  | FP318      | 4     | SP1508 <i>atpD</i> mutant*              | this work               |
| FP506  | FP321      | 4     | SP1509 <i>atpG</i> mutant*              | this work               |

\*see Table 3 for detailed description.  
doi:10.1371/journal.ppat.1004026.t001

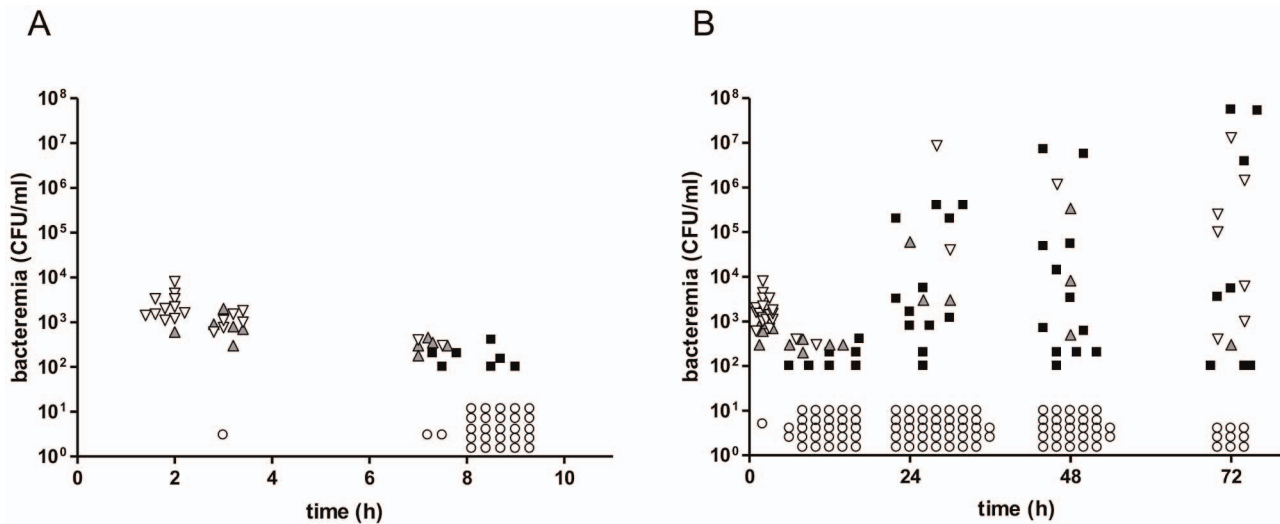

**Figure 1. Co-infection of CD1 mice with three isogenic variants of *S. pneumoniae* TIGR4.** A mixture of three isogenic *S. pneumoniae* TIGR4 variants ( $3 \times 10^5$  CFU/each strain) was given to CD1 mice ( $n=68$ ) by the i.v. route. Bacterial counts were performed collecting blood at various time points. (A) Blood counts in the first 10 h after challenge. (B) Blood counts up to 72 h post-challenge, (including data reported in A). Each symbol indicates a single mouse. Blood cultures yielding all three variants are shown in downward white triangles, those yielding two variants as upward grey triangles, and samples yielding a monoclonal blood culture are shown as black squares. Samples from mice with negative blood cultures are shown as open circles. The ratio of infected over un-infected mice was 0.31 at 24 h, 0.37 at 48 h and 0.67 at 72 h. The cut off for detection is 100 CFU/ml. Data of two independent experiments are reported. doi:10.1371/journal.ppat.1004026.g001

concentrations (up to  $1 \times 10^6$  CFU) in 17/55 (31%) mice at 24 h, 16/43 (37%) mice at 48 h and 15/24 (62%) mice at 72 h (Figure 1B). At all these time points, most blood samples yielded colonies of only one of the variants: 12 out of 17 blood cultures at 24 h, 12/16 at 48 h and 8/16 at 72 h. Among the 32 single-variant blood samples each variant was more or less equally represented as the progenitor, although owing to the smaller challenge dose of strain FP318 in one experiment, this strain was recovered at lower density from the blood and caused fewer single-variant infections (Table S1). In three of twelve mice for which three serial blood cultures were taken we observed an increase in the number of variants. One of these mice showed evidence of infection with 3 variants at 48 h after earlier having a monoclonal infection and a further two mice had three variants infection at 72 h after having previously had infection with only one or two variants respectively. Seven of the single-variant bacteraemia isolates were checked for colony morphology and each was found to have the opaque phenotype, in contrast to the challenge strains (not-mouse-passaged) that yielded a mixed population of about similar proportions of opaque and translucent colonies [29].

The bacterial counts from cultures of spleen tissue were assayed in twelve mice at each time point (Figure S1). All mice which had positive blood cultures showed bacterial counts also in splenic samples. In addition, small numbers of organisms were cultured from spleen tissue both at 24 and 48 h in two mice each which presented with sterile blood cultures. Similarly at 72 h, bacteria were only detected in the spleen in one mouse (Figure S1). These data show that infectious foci can be detected in the spleens of mice that have negative blood cultures, indicating that the spleen is the probable site where the infection originates.

### Statistical analysis shows that bacteraemia is independently founded by a single organism

Our data indicate that the near totality of bacteria in the challenge with three isogenic pneumococcal variants is cleared by

the immune system (predominantly by splenic macrophages; see below) and that few bacterial cells remain viable within a defined site of the host (i.e. the spleen). This small number of bacteria may start to grow and re-invade the host giving rise to bacteraemia. In our experimental infection most of the mice challenged were not bacteraemic and, of those becoming bacteraemic, most were infected by a single bacterial variant. In addition, we detected in some mice an increase in variants within blood cultures over time. These data indicate that over time more than one invasion event may occur. Theoretically bacteraemia may be generated in two ways: (i) by a single bacterium establishing a population in the blood in a single invasion event or several bacteria each independently establishing a population in distinct invasion events (independent action); (ii) by a defined number (more than one) of bacteria acting together to invade once or several times (co-operative synergism) [22]. We hypothesise that the former explanation prevails.

To statistically evaluate the number of bacteria involved in founding the blood population in each invasion event, we construct a model that assumes that bacteria invade and establish a population in the blood at random (Supplementary text) [23]. In this model, the number of invasion events in each mouse is assumed to follow a Poisson distribution so the expected number can be estimated from the proportion of the non-bacteraemic mice. Then we determined the expected numbers of mice infected with one, two or three variants, assuming that the number of bacteria ( $w$ ) responsible for establishing the blood population in each invasion event were 1, 2, 3, etc (Table 2). Given that some mice were culled during the course of the experiment and some got multiple samplings, we limited the statistical analysis to the observations at the 24 h time point. In table 2, we report the comparison between the expected versus the observed numbers of the infected mice with one, two and three variants for different numbers of bacteria ( $w$ ) potentially responsible for founding a population blood. The statistical analysis shows that the most

**Table 2.** Statistical analysis: number of blood cultures with one, two or three pneumococcal variants observed at 24 h in the experimental infection compared to those predicted from the statistical analysis.

|                                    | total | one   | two   | three |             |
|------------------------------------|-------|-------|-------|-------|-------------|
| <b>Observed infection outcome</b>  | 17    | 12    | 3     | 2     |             |
| <b>Predicted infection outcome</b> |       |       |       |       | <i>P</i>    |
| <b>w = 1</b>                       | 17    | 14.91 | 1.99  | 0.07  | <b>0.10</b> |
| <b>w = 2</b>                       | 17    | 4.76  | 10.78 | 1.42  | 0.00        |
| <b>w = 3</b>                       | 17    | 1.57  | 10.03 | 5.37  | 0.00        |
| <b>w = 4</b>                       | 17    | 0.52  | 7.57  | 8.88  | 0.00        |

doi:10.1371/journal.ppat.1004026.t002

probable number of bacteria responsible for establishing a blood population is 1 (Table 2). Note that the p-value was calculated by combining data for blood cultures with two or three variants because of the small expected frequencies in these two categories. Given that *w* is equal to one, we conclude that polyclonal blood infections are the result of more than one invasion event, each event founded by a single bacterium, consistent with the observed time-dependent increase in the frequency of polyclonal bacteremia over the 72 h of the experiment.

#### Depletion of macrophages and neutrophils defines the key role of innate cellular immunity in early clearance of bacteraemia

Prior to the assessment of the impact of host factors in the control of bacteraemia, we compared bacterial counts in the blood of two mouse strains known to be resistant to pneumococcal infection (outbred CD1 mice and inbred BALB/c mice) and a susceptible mouse strain CBA/Ca [30]. The mice were inoculated i.v. with a mixture of three encapsulated pneumococcal strains of different serotypes, D39 (type 2), TIGR4 (type 4) and G54 (type 19F). Bacterial clearance in CD1 and BALB/c mice showed similar kinetics (Figure 2 A–B), while CBA/Ca mice were less able to reduce the initial number of bacteria (Figure 2 C). All mouse strains cleared G54 bacteria immediately (no positive blood culture 10 min after infection) and showed a first phase of rapid clearance also for both D39 and TIGR4. Only the two resistant mouse strains showed bacterial numbers in the blood that were less than the limit of detection. In contrast, bacterial numbers increased in the susceptible strain after the first phase (Figure 2 A–C). This indicates that, depending on which host-pathogen pair was investigated, the bottlenecks may vary considerably. Since BALB/c mice showed a more uniform clearance of bacteria, subsequent experiments were conducted with this mouse strain in order to keep experimental groups to a minimal size.

To identify the host immune cells responsible for the initial clearance of bacteria from the blood, we performed a set of experiments in BALB/c mice depleted either of macrophages or neutrophils. Macrophage depletion was achieved by intraperitoneal (i.p.) injection of clodronate liposomes and neutrophil depletion by using anti-GR-1 monoclonal antibody [31–33]. Control groups were treated either with PBS-containing liposomes as control for clodronate experiments or with isotype-matched antibody in the case of experiments with anti-GR-1. The results obtained for the control groups were comparable to the untreated control mice and differed from the groups of mice treated with clodronate (Figure S3 A–C) or anti-GR-1 (Figure S3 E–G). To verify macrophage or neutrophils depletion, spleen samples were analyzed by flow cytometry. The reduction of macrophages in the

spleen of clodronate-treated mice was  $61\% \pm 14.2$  measure by anti-F4/80 and  $47\% \pm 10.4$  by anti-CD11b compared to naïve mice. Similar results were obtained when liver samples were analyzed (Figure S3 D). In anti-GR-1-treated mice, the neutrophil number was reduced by  $83\% \pm 2.7$  as compared to control mice (Figure S3 H). To check for anti-pneumococcal antibodies in naïve mice, we evaluated the reactivity of mouse serum towards whole pneumococcal cells. Mice had no detectable serum antibodies to any of the pneumococcal serotypes (Figure S3 I–K). A result supported by the observation that addition of type specific rabbit serum to the blood from naïve mice conferred specific bactericidal activity ( $P < 0.01$ ).

To analyse the role of macrophages and neutrophils, mice were divided into three groups: untreated (Figure 3 A1–A4), clodronate-treated (Figure 3 B1–B4), and anti-GR1-treated (Figure 3 C1–C4). After i.v. challenge with a mixture of four different strains (TIGR4, D39, DP1004 and G54), time course of bacterial counts was monitored by sampling blood, spleen, lung, liver and kidney (Figure 3 and S2). Analysis of control mice allowed categorisation of the pneumococcal strains into two groups: TIGR4 and D39, which were slowly cleared (virulent strains), and G54 and DP1004, which were cleared from the blood within minutes. The counts of TIGR4 and D39 were higher in the blood than in the spleen at 5 min and at 4 h compared to the other two strains ( $P < 0.05$ ). Bacterial loads in the other organs were similar to those found in the spleen (Figure S2). In contrast, mice infected with strains DP1004 and G54 showed higher CFU counts in the spleen than in the blood and other organs ( $P < 0.05$  at 5 min for both strains,  $P < 0.01$  at 4 and 8 h for DP1004) (Figure 3 A3–4).

The groups of mice depleted of macrophages showed significantly reduced ability to clear bacteria from the bloodstream. An increase in bacterial numbers in blood from 5 min to the later time points was observed in mice infected with TIGR4 (Figure 3 B1) and D39 (Figure 3 B2) ( $P < 0.01$ ). Blood bacterial counts were significantly higher in the clodronate-treated mice than in the control group ( $P < 0.05$  for all time points for both D39 and TIGR4). Bacterial counts of TIGR4 and D39 in liver and spleen were lower but with a similar trend, over time, to those in the blood (Figure 3 B1–B2 and Figure S2 B1–B2). In clodronate-treated mice, the numbers of non-virulent bacteria (strains G54 and DP1004) were higher in the blood than in the spleen ( $P < 0.05$  at 5 min for DP1004 and  $P < 0.05$  at 5 and 4 h for G54) and paralleled the trend observed for the virulent strains TIGR4 and D39 in untreated animals (Figure 3 B3–B4 compared to A1–A2).

In neutrophil-depleted mice, bacterial counts of both TIGR4 (Figure 3 C1) and D39 (Figure 3 C2) in blood and spleen decreased in the first 4 h after challenge with a similar trend to that observed in untreated animals. Thereafter, blood and organ

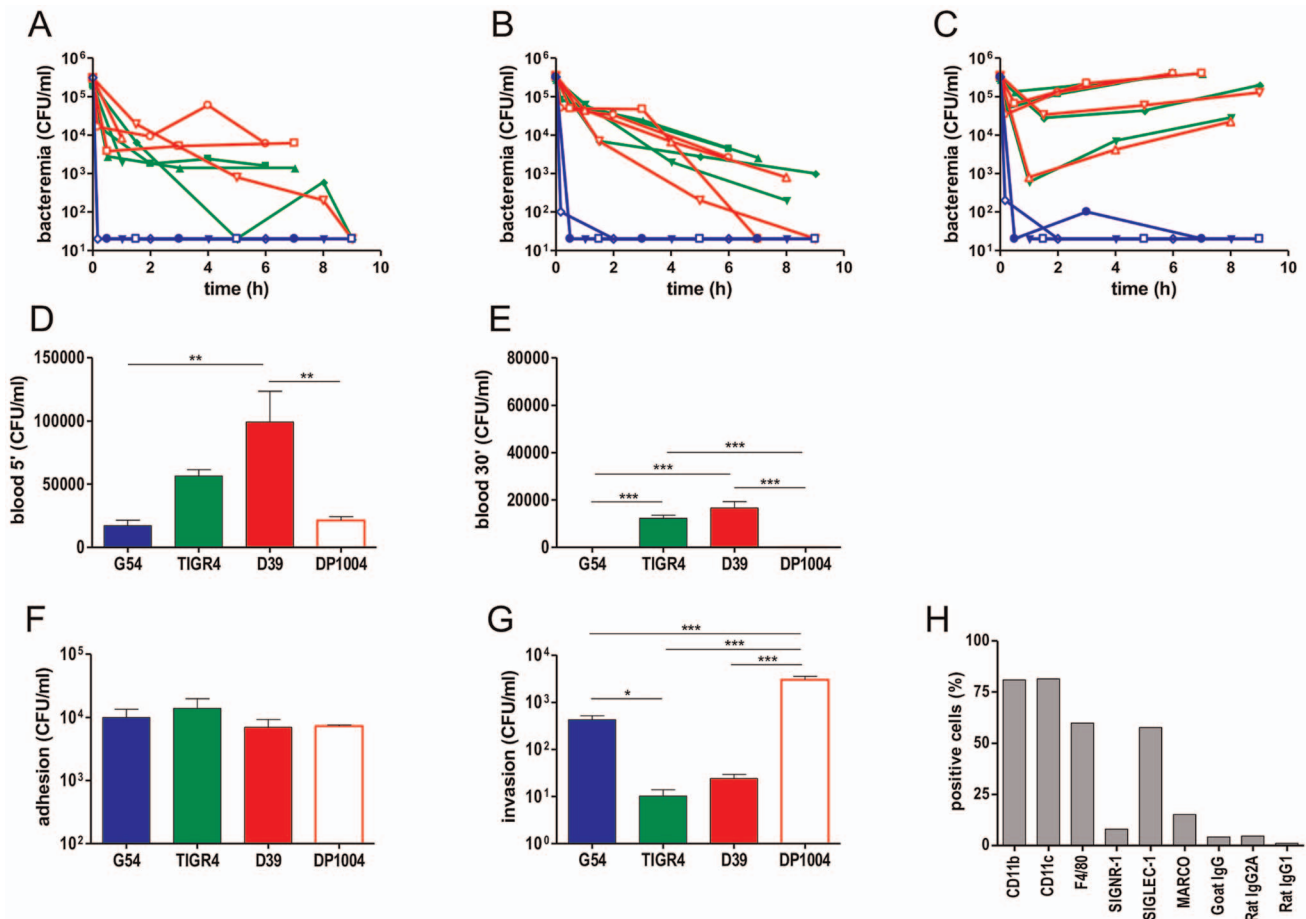

**Figure 2. Pneumococcal sepsis and phagocytosis by splenic macrophages.** Intravenous challenge of four outbred CD1 mice (A), four inbred BALB/c mice (B) and four inbred CBA/Ca mice (C) was performed by co-infection with D39 (red), G54 (blue) and TIGR4 (green). Bacterial counts in blood collected at different time points from each single mouse are reported (A–C). Cut off is 100 CFU/ml. Blood counts at 5 min (D) and 30 min (E) after i.v. infection of BALB/c mice ( $n=6-12$ ) with four pneumococcal strains: D39 (red bar), G54 (blue bar), TIGR4 (green bar) and a rough D39 derivative DP1004 (red open bar). Adhesion (F) and invasion (phagocytosis) (G) of pneumococcal strains in primary spleen macrophages from BALB/c mice. Independent experiments were run in triplicate and reported as mean  $\pm$  SEM. Statistical analysis were performed with Kruskal-Wallis and Dunn's test. (H) Cytofluorimetric characterisation of surface markers of the primary spleen macrophages. A representative experiment is reported. Comparable data on splenic macrophages isolates from C57BL/6 mice are in Figure S4. doi:10.1371/journal.ppat.1004026.g002

counts remained stable (Figure 3 C1–C2 and Figure S2 C1–C2). For both virulent strains, the number of bacteria were higher in the blood than in the spleen ( $P<0.01$  at 5 min). Interestingly, strain G54 had a peculiar behaviour in neutrophil-depleted mice, as it persisted in the spleen at high levels throughout the whole experiment despite being cleared from the blood within a few min of infection ( $P<0.001$  at 4 and 8 h), (Figure 3 C4). At 4 h post-infection G54 bacteria reappeared in the blood (Figure 3 C4). The experiment was repeated for the later time points, and the pattern of counts was identical. The rough DP1004 strain was cleared from each body site as well as in untreated mice (Figure 3 C3).

To determine more precisely the early events occurring in the clearance of pneumococci, we have plotted separately the data on blood bacterial counts obtained 5 min and 30 min after challenge (Figure 2 D–E). In untreated mice, bacterial blood counts of the invasive strains D39 and TIGR4 were respectively  $6.2 \times 10^4$  and  $5.4 \times 10^4$  CFU/ml, while those of the non-invasive strains, DP1004 and G54, were three times lower (reduction of 60 to 75%). Differences between the virulent and non-virulent strains were statistically significant ( $P<0.01$ ).

### Spleen-derived macrophages have exceptional phagocytic properties

Given the key role of splenic macrophages in pneumococcal clearance, we evaluated the capacity of splenic macrophages to internalise pneumococci. Splenic BALB/c macrophages were grown as primary cell cultures, washed and re-cultured for seven days in M-CSF supplemented medium. Cytofluorimetric data showed expression of the characteristic markers of splenic macrophages, CD11b, CD11c, F4/80 and SIGLEC-1 (Figure 2 H) [34]. Adhesion was evaluated by counting pneumococci after 45 min and phagocytosed bacteria were enumerated by plating after a further 30 min of antibiotic treatment (viable intracellular bacteria). Despite similar values in adherent cells (Figure 2 F), our data show higher numbers of intracellular bacteria for the rough DP1004 and for the G54 strain and less for the virulent D39 and TIGR4 (Figure 2 G). Essentially identical data were obtained when performing the experiment with splenic macrophages from C57BL/6 mice, while in contrast bone marrow macrophages from BALB/c mice and RAW264.7 macrophages showed different patterns of surface markers expression to the spleen macrophages and their phagocytosis of pneumococci showed no correlation to

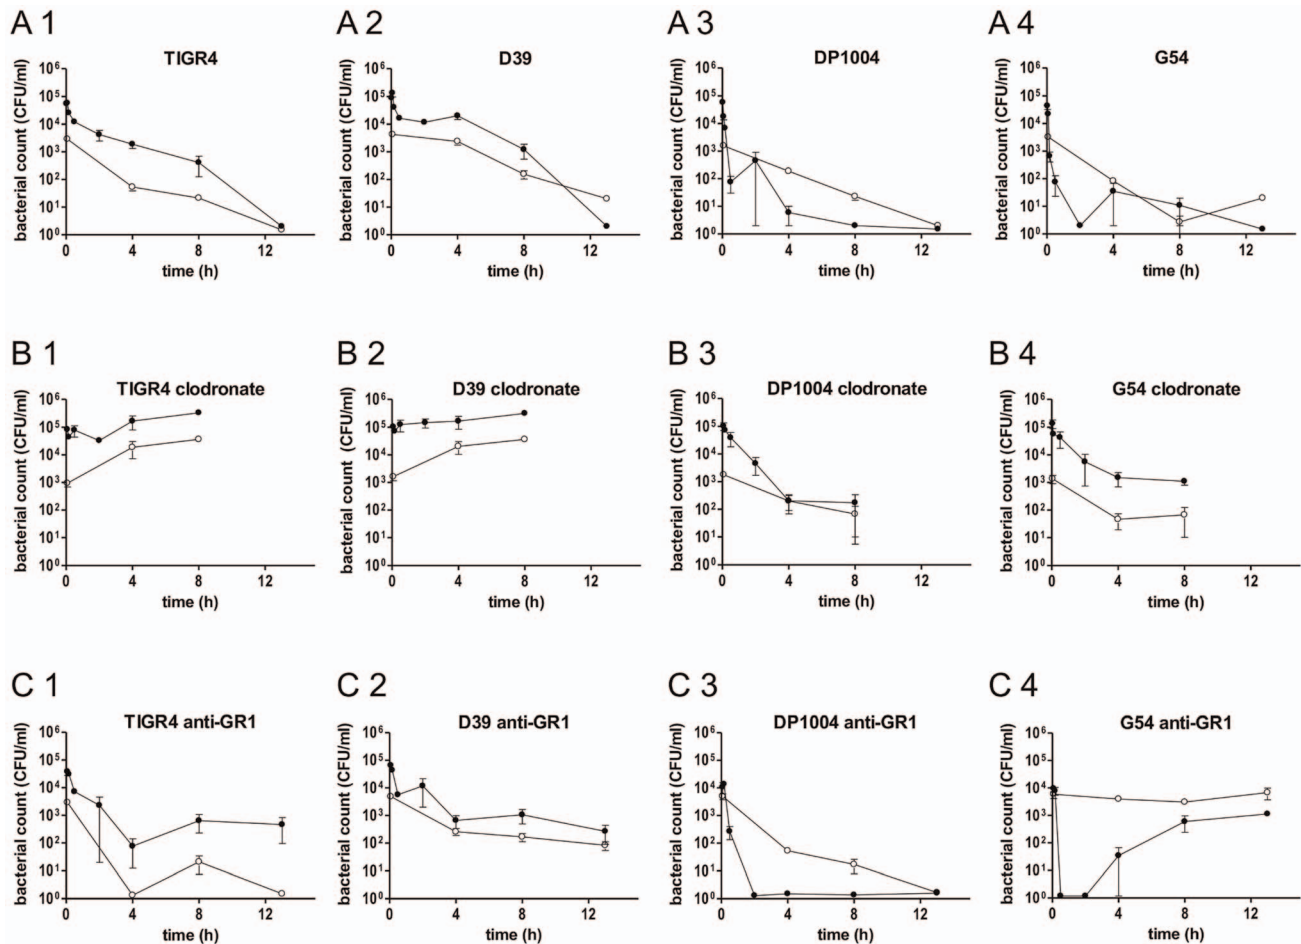

**Figure 3. Bacterial counts in blood and spleen of BALB/c mice depleted of neutrophils or macrophages.** Twelve groups of BALB/c mice ( $n=3-9$ ) were infected by the i.v. route with four different strains of *S. pneumoniae* (TIGR4, D39, DP1004 and G54) at the challenge dose of  $2.5 \times 10^5$  CFU/each strain. Bacterial counts over time of each pneumococcal strain in the blood (black lines) and in the spleen (grey lines) were reported for untreated mice (A1, A2, A3 and A4), clodronate liposomes treated mice (B1, B2, B3 and B4) and anti-GR1 mAb treated mice (C1, C2, C3 and C4). Samples were collected over 13 h, with the exception of mice treated with clodronate (8 h). The cut off is 20 CFU/ml. Data are reported as the mean  $\pm$  SD of bacterial counts.

doi:10.1371/journal.ppat.1004026.g003

the extent of early clearance in the host (Figure S4). These data emphasise the importance in the choice of cell lines for performing phagocytosis assays in vitro to assess pneumococcal clearance in vivo.

### Whole genome sequencing identifies genetic evidence for a single cell bottleneck and adaptive mutations

Pneumococci grown from the blood of 6 mice were subjected to whole genome sequencing (Table 3). In each case, the isolates had the identical antibiotic resistance phenotype and were therefore presumptively monoclonal. Two of the blood cultures were obtained from the same mouse, but at 24 or 48 h respectively, (mouse 3.1.5; Table 3). To identify possible mutations characterising the founding cell of the monoclonal blood culture, we searched for single nucleotide polymorphisms (SNP) present in all cells isolated from a given blood culture. Such a SNP would demonstrate that the re-expanded population arose from a single cell. We identified one or two SNPs in 100% of the bacterial populations from four out of six mice (3.1.5, 4.1.4, 4.2.2 and 4.2.6), when compared to bacteria from the challenge inoculum (Table 3). The identification of a SNP common to all bacteria of a given

sample is conclusive genetic evidence that the pneumococcal populations were monoclonal. Further, the SNPs were either intergenic, silent or in regions not predicted to be functional in pathogenesis. Thus, we conclude that these mutations were unlikely to be associated with changes in within-host fitness. This argues strongly that bacteremia was founded as the result of a stochastic process rather than the selection of fitter variants. However, further analysis identified a second set of SNPs in pneumococci of 5 of 6 blood cultures. Crucially, this second set of SNPs were only found in a proportion of the bacteria obtained from mouse blood and therefore must have occurred after the bottleneck. Further, these SNPs differed between isolates of different mice, but all were located within distinct sub-units of the pneumococcal F1/F0 ATPase operon (Table 3). In three bloods, more than one SNP was detected. To determine if more than one SNP in the ATPase operon occurred in a single cell, we sequenced single colony isolates of these populations. In all cases, where a multi-SNP profile would have been possible according to the genomic data, only clones with a single SNP within the F1/F0 ATPase operon were recovered. These isolates included FP490, a 3.2.4 derivative with a SNP in *atpA*, FP487, a 3.1.5 derivative with

**Table 3.** Genome sequencing data of pneumococcal colonies from monoclonal blood cultures.

| Mouse ID   | Challenge | SNP <sup>a</sup> | Amino acid           | Gene mutated                         | % of population | Clone |
|------------|-----------|------------------|----------------------|--------------------------------------|-----------------|-------|
| 3.2.4 48 h | FP321     | G1418898T        | A490E                | <i>atpA</i> F1F0 ATPase, F1 alpha    | 46              | FP503 |
|            |           | G1421811C        | P111A                | <i>atpB</i> F1F0 ATPase, F0 A        | 12              | FP490 |
| 4.1.6 48 h | FP321     | C0445820A        | S10stop              | <i>pilus</i> sortase                 | 15              |       |
|            |           | G0460918C        | I341M                | <i>trkA</i> potassium uptake protein | 13              |       |
|            |           | G1416894A        | R330C                | <i>atpD</i> F1F0 ATPase, F1 beta     | 42              | FP489 |
|            |           | C1417244T        | G213D                | <i>atpD</i> F1F0 ATPase, F1 beta     | 12              | FP498 |
| 4.2.6 48 h | FP321     | G1419354A        | T338I                | <i>atpA</i> F1F0 ATPase, F1 alpha    | 17              | FP504 |
|            |           | G1418268T        | P193Q                | <i>atpG</i> F1F0 ATPase, F1 gamma    | 29              | FP506 |
|            |           | C1418341A        | D169Y                | <i>atpG</i> F1F0 ATPase, F1 gamma    | 12              |       |
|            |           | G1420251T        | A39E                 | <i>atpA</i> F1F0 ATPase, F1 alpha    | 19              |       |
| 4.1.4 24 h | FP122     | C1570673T        | silent               | <i>murF</i> D-ala-D-alanine ligase   | 100             |       |
|            |           | G1488683T        | T11K                 | <i>pcnA</i> nicotinamidase           | 100             |       |
| 3.1.5 24 h | FP318     | T0248016G        | intergenic           | intergenic ( <i>psg</i> SP0272)      | 100             |       |
|            |           | C0555356A        | L420I                | <i>metE</i> methionine synthase      | 61              |       |
|            |           | AAAT1416121-     | L115 fs <sup>b</sup> | <i>atpC</i> F1F0 ATPase, F1 epsilon  | 58              | FP487 |
|            |           | T0248016G        | intergenic           | intergenic ( <i>psg</i> SP0272)      | 100             |       |
| 3.1.5 48 h | FP318     | C0555356A        | L420I                | <i>metE</i> methionine synthase      | 65              |       |
|            |           | C0719460A        | N129K                | Hypothetical                         | 12              |       |
|            |           | G0804415T        | intergenic           | intergenic ( <i>livE</i> SP0857)     | 14              |       |
|            |           | AAAT1416121-     | L115 fs <sup>b</sup> | <i>atpC</i> F1F0 ATPase, F1 epsilon  | 62              |       |
| 4.2.2 48 h | FP318     | C1416893A        | R330L                | <i>atpD</i> F1F0 ATPase, F1 beta     | 95              | FP505 |
|            |           | C1162082T        | R436H                | <i>fts</i> tetrahydrofolate ligase   | 100             |       |
|            |           | C0239125A        | H310N                | glycosyl hydrolase, family 1         | 100             |       |

<sup>a</sup>numbering refers to position in the TIGR4 genome (NC\_003028).<sup>b</sup>frame shift. All F1/F0 ATPase mutations were deposited in GenBank (accession KF705516 to KF705525).  
doi:10.1371/journal.ppat.1004026.t003

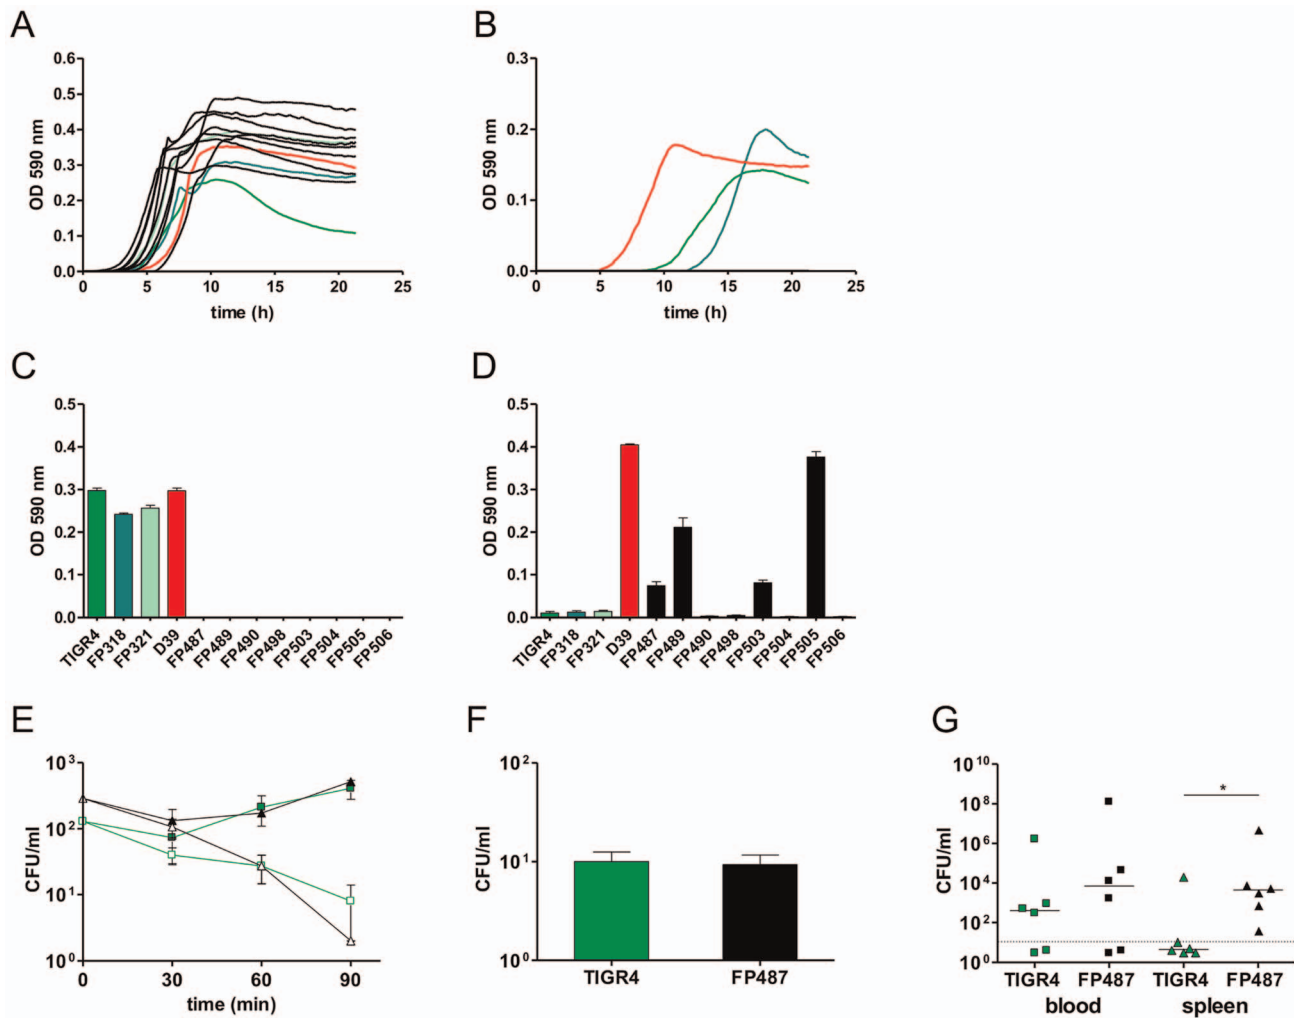

**Figure 4. Phenotypes of single-colony blood culture isolates.** Growth profiles of wild type strains (coloured lines) and ATPase mutants (black lines) in standard laboratory media THY (A) and TSB (B). D39 is indicated in red while TIGR4, FP318 and FP321 in different shade of green. (C, D) Maximum OD<sub>590</sub> reached by wild type and ATPase mutants during growth with 80 mM K<sub>2</sub>HPO<sub>4</sub> and pH 8.0 (D) and growth at pH 6.6 (E). Kinetics of opsono-phagocytosis assays in rotating blood with anti-type 4 serum (open symbols) and without antibodies (filled symbols) of parental strains (green) compared to a SP1507 *atpC* mutant (black). (F) Phagocytosis with primary cultures of spleen macrophages of TIGR4 and FP487 *atpC* mutant. (G) Bacterial counts in blood (squares) and spleen (triangles) at 72 h after i.v. infection of BALB/c mice (n = 6) with TIGR4 (green) and FP487 carrying a frame shifted SP1507 *atpC* gene (black). Data points below the cut off are negative. All data were analyzed by Student's *t*-test (*P* < 0.05). doi:10.1371/journal.ppat.1004026.g004

a SNP in *atpC*, and FP489 and FP498, two 4.1.6 derivatives with different SNPs in *atpD* (Table 1 and 3). In few cases subpopulations with mutations in other genes were detected (pilus sortase, potassium uptake protein, *metE*, and SP0760) (Table 3), but no confirmation by direct sequencing was performed for these genomic data and we do not think that these mutations are of major biological relevance.

#### Ex vivo pneumococci with ATPase mutations show variation in metabolic fitness

Phenotypic analysis of eight independent ex vivo blood isolates each having a mutation (SNP) in the ATPase (Table 1 and 3), showed normal colony morphology on agar plates and no significant change in their susceptibility to optochin. In liquid culture, the mutants showed normal or more efficient growth in Todd Hewitt Yeast Extract (Figure 4 A), but were unable to grow in other media (Tryptic Soy Broth) (Figure 4 B). Given that the F1/F0 ATPase is involved in multiple aspects of proton trafficking,

we investigated the impact of pH, buffer composition and salt concentration on bacterial growth. Using a phenotype microarray for osmotic susceptibility using Biolog microtiter plates PM9, we compared the phenotype of parental strains derived from strain TIGR4 to the ex vivo mutants. The mutants had acquired a series of metabolic characteristics, also shared by strain D39 (Figure S5). Growth experiments performed in serial buffer and salt dilutions showed that TIGR4 and its isogenic derivatives used in the challenge experiments had a restricted pH optimum when compared to D39, which limited growth at potassium phosphate concentrations below 10 mM and pH below 6.8 (Figure 4 D). Interestingly many of the mutants had gained this capacity, making them equally able to grow at low pH as D39. In contrast, high buffer concentrations (80 mM K<sub>2</sub>HPO<sub>4</sub> and pH 8), inhibited growth of all mutants (Figure 4 C).

To investigate effects on intracellular pH homeostasis of the ATPase mutations we transformed the frame-shift in the *atpC* gene into the non-encapsulated strain DP1004. Using in vivo NMR, the



*atpC* mutant and its parental strain were both shown to have an identical intracellular pH of 6.52 to 6.56 during active metabolism of glucose. No differences in susceptibility to neutrophil killing were observed when mutants were assayed in an opsonophagocytosis assay in the presence of type specific antibodies (Figure 4 E). Also, data of macrophage phagocytosis were unaltered in primary cultures of splenic macrophages (Figure 4 F). To check for any fitness cost *in vivo*, the encapsulated *atpC* mutant was compared to the challenge strain FP321 in our i.v. mouse sepsis model. At early time points both strains showed comparable blood counts (data not shown). Also at 72 h post-challenge, bacterial counts in blood were similar, but bacterial spleen counts for the *atpC* mutant were significantly increased when compared to the wild-type (Figure 4 G).

## Discussion

We have investigated the pathogenesis of pneumococcal bacteraemia following intravenous inoculation of mice with three isogenic clones (variants). In our model, the infection followed the classic, three phase pattern in which a majority of pneumococci are cleared in the first minutes post-challenge. This leads to an “eclipse phase” of several hours in which bacterial numbers decline further or are undetectable. This is followed by the emergence of sustained and high density bacteraemia in a proportion of the challenged animals [8,10]. By analysing the survival in the blood of three isogenic variants of *S. pneumoniae*, we observed that the majority of blood cultures arose from only one of the three variants. We used a statistical model to characterise the infection dynamics in which the number of bacteria starting the infection in each invasion event is  $w$  and the number of times this happens is  $k$  [23]. From the model, we could infer that the number of bacteria at the origin of infection is below 2 ( $w = 1$ ). Thus, it follows that bacteraemia was generated by either (a) a single bacterium establishing a population in the blood in a single invasion event or (b) several bacteria each of which independently established a population in distinct invasion events. The probability of (b) is small (about 5% in our data, because the probability of two or more invasion events occurring is about 5%). Genome sequencing provided genetic evidence in 4/6 cases that monoclonal bacteraemia did actually start from a single bacterial cell ( $w = 1$ ) confirming the first statement. For the remaining 2/6 cases we could not determine  $w = 1$  by genome sequencing as we could not distinguish several invasions of a single bacterial variant from one invasion of several cells of the same variant without any SNPs. More complex is the experimental observation of invasive events. For this we could document bacteraemia in mice with previous negative blood samples ( $k \geq 1$ ) and in other mice the increase of variants in serial blood samples ( $k > 1$ ). Since after the first 24 h the observed numbers of both these types of invasion events are similar, this strongly favours the occurrence of polyclonal infections resulting from independent, not cooperative action. In the case of *H. influenzae* it had been hypothesised that the single cells giving rise to the monoclonal infection might be selected by within-host evolution [23]. Our work now tests this hypothesis by whole genome sequencing. The data show in two cases absence of any SNPs and in four cases SNPs that apparently do not indicate selection for virulence. Despite the low numbers, it suggests that the single cells at the origin of infection apparently have no advantage (higher virulence) over the other cells in the population. Such results show that the bacteria in the challenge dose act independently to give rise to infection, that each has a similar probability of causing infection and that a dose near the LD50, a single cell may initiate disease. These criteria satisfy the theory of

independent action [16,17,22,23]. As such our investigation provides strong evidence that the single founding cell of an invasive infection is the result of a stochastic event. However, it must be emphasised that epigenetic variations would have eluded our genetic and genomic analysis.

Previously published studies have shown a major role for splenic macrophages in the initial clearance of pneumococci. In the seminal investigations of Brown et al. [35], they conclude: “... it appears that an anatomically normal spleen plays a unique role in the clearance of experimental pneumococcal bacteraemia, and that this role is of increasing importance as the pathogenicity of the invading organism increases”. Our data provide evidence that splenic macrophages have properties not found in those derived from other tissue sites, with respect to their efficiency to ingest and kill pneumococci. It is worth noting that the impressive efficiency of splenic clearance *in vivo* in the non-immune host is somewhat at odds with the relatively inefficient ingestion and killing of pneumococci in standard *in vitro* phagocytosis assays [34]. The innate host factors that result in the removal of the vast majority of bacteria within 45 minutes of challenge [11,35,36] deserve further attention.

Despite the efficiency of splenic macrophages in clearance, sustained bacteraemia eventually occurs after an eclipse phase of several hours during which bacteria are largely undetectable in blood. Similar data were obtained in work based on intranasal inoculation of *H. influenzae*, where also mixed blood cultures were detected in the first minutes after challenge and before the eclipse period [25]. We propose for our intra venous injection model that during this time, a fraction of the inoculated bacteria are sequestered in extravascular tissues, most probably in the spleen, in accordance with our data on positivity of bacterial spleen counts also in mice with negative blood cultures (Figure S1). This emergence of a clone from the potential splenic focus into the “sterile” bloodstream can be viewed as equivalent to the “invasive events” described for models which consider more than one organ system [16,18,21,23–25]. Sustained bacteraemia is initiated from replication of one bacterial cell, perhaps a stochastic event in which the first replicon to reach a threshold biomass sufficient to seed the blood “wins the day”. The exponential increase in the number of bacteria in the blood is consistent with contributions from both intravascular and extravascular replication of pneumococci. We favour a scenario in which, at a challenge dose below the LD50, the rate of replication occurring in the extra-vascular site, followed by seeding of bacteria to the blood, exceeds host clearance rates thereby resulting in progressively more severe bacteraemia. Our data do not infer that only one pneumococcus survives the initial host clearance, but rather that from those that do survive; only one cell initiates bacteraemia. The observed increase of polyclonal infections over time, as predicted also by the independent action hypothesis, is in accordance with the doubling of the ratio of infected mice at those time points (0.31 at 24 h to 0.67 at 72 h) [22]. The strong positive selection which drives the emergence of the ATPase-SNP subclones during the later phase of the infection is novel with respect to previous models (i.e. the live-death model), which postulates a neutral selection during this phase [16,17,37]. The in depth genomic analysis, in contrast to previous works [16,17,37], shows evidence for a more dynamic behaviour of the infecting bacterial population with an increase in heterogeneity of the monoclonal population over time due to a strong positive selection after the single cell bottleneck.

However, we observed added complexity; the residual, but inadequate, innate clearance mechanisms exert a selective pressure resulting in the emergence of adaptive mutants. Sequencing of bacteria from blood revealed that in most mice the bacterial clones

had each acquired SNPs in different sub-units of the pneumococcal F1/F0 ATPase gene. This apparently high frequency of mutations, given the relatively small biomass of pneumococci in each animal, is consistent with the estimated mutation rates of up to  $5 \times 10^{-4}$  per genome described recently for pneumococci during one-cell bottleneck *in vitro* passages [38]. The selection for altered function of the ATPase, was found only in a proportion of the bacteria making up the population obtained from blood, compelling evidence that the ATPase mutations must have occurred after the single cell bottleneck. As stated above, the observation of subclones being selected during the bacteremic phase underlines a highly dynamic situation, which extends over the neutral two stage infection models [16,17,37].

In pneumococci, it has been recognised that ATPase mutations occur at high frequency during pneumococcal infection in humans, possibly in response to oxidative stress [39], and have been described both *in vitro* and in clinical isolates [40–44]. Polymorphisms in F0\_atpA and F0\_atpC (the trans-membrane part of the ATPase) were found to confer phenotypes of reduced susceptibility to optochin, quinine and mefloquine [40,42,43]. In particular, the detection of optochin resistant pneumococci in clinical samples is well described [44], as it has a practical impact on pneumococcal identification in the diagnostic laboratory [41]. None of the *ex vivo* ATPase mutants in our investigation were optochin resistant and the SNPs accordingly did not map to the optochin resistance conferring regions.

The F1/F0 ATPase is encoded by a highly conserved eight-gene operon and, as in aero-tolerant anaerobes, it is involved in the maintenance of intracellular pH through the generation of a membrane proton gradient [45]. In some of the mutants we were able to identify a clear metabolic benefit of the mutations which enabled growth at pH lower than 6.8, albeit all mutants showed that loss of capacity to grow at pH above 7.8. Interestingly the phenotype of TIGR4 mutants recovered from blood was not different from other virulent pneumococcal stains, such as D39. The high frequency of mutation observed here, given by the many different sites mutated, strongly suggests within-host adaptation through selective pressure during sepsis. While *in vitro* susceptibility of the ATPase mutants to antibody mediated neutrophil killing and macrophage phagocytosis was essentially unaltered, the phenotypic consequence of the ATPase mutations may be linked to a gain in fitness related to the increased survival of bacteria within the splenic, extravascular focus that provides the source of pneumococci re-seeding the blood and sustaining the progressively escalating and ultimately lethal bacteraemia. In agreement with this hypothesis is the recent description of inhibition of the own F1F0 ATPase by both *Salmonella enterica* and *Mycobacterium tuberculosis* as strategy to withstand phagolysosomal activity [46].

In summary, we propose that after the majority of the bacteria of the challenge inoculum have been removed, a few bacteria survive the predominantly lethal activity of splenic macrophages and neutrophils. From these rare survivors, single pneumococcal cells may start to replicate and initiate seeding of the blood resulting in a steady state bacteraemia in which efficient host clearance is off-set by re-seeding from the original, persisting extravascular reservoir of bacteria. These extravascular bacteria are subjected to strong selection for adaptive mutations. Later during infection, selected subpopulations of the initial clone may become part of the bacterial population causing disease. These observations are in accordance with a two stage model of infection where independent action generating the initial stochastic event is followed by a dynamic birth-death phase which increases heterogeneity due to strong selection [16,17,24]. In the case of the model organism *S. pneumoniae*, our data show different selective

pressures shaping the invasive bacterial population during different phases of infection [16]. Given the demonstration that pneumococci are independent in generating disease in our rodent model and that less than twenty per cent of human pneumonia cases are bacteraemic [3], we hypothesize that human pneumococcal bacteraemia is generally monoclonal originating from a single cell in analogy to the monoclonal meningitis case recently described [47]. Presentation of a model which foresees development of invasive disease from a single bacterium and strong selection during outgrowth represents an important example on which to model fitness selection during invasive infection.

## Materials and Methods

### Pneumococcal strains and growth conditions

Three isogenic *zmpC* knock-out mutants of TIGR4 (FP122, FP318 and FP321) that differed only for the resistance marker, *ermB* (erythromycin resistance), *aad9* (spectinomycin resistance) and *aphIII* (kanamycin resistance), respectively were constructed for co-infection studies with isogenic clones [28,48]. The experiments with mice depleted of macrophages and neutrophils were done with four different strains: TIGR4 (serotype 4; strain FP321 *zmpC::aphIII*), G54 (serotype 19F; erythromycin and tetracycline resistant) [49,50], D39 (serotype 2; strain FP335 *bglA::aad9*; gift of Hasan Yesilkaya, Leicester), and the streptomycin resistant non-encapsulated D39 derivative DP1004 [51,52]. The transfer of the *atpC* frame-shift into DP1004 was performed by transformation of a marker flanked by two PCR fragments, one of which containing the frame-shift. This was possible since the *atpC* SNP is only 76 bp from the end of the operon. Two representative transformants FP499 and FP500 were confirmed by sequencing. The series of ATPase mutants isolated are described in Table 3, while all other strains are listed in Table 1. Strains were cultured in Tryptic Soy Broth (TSB, Liophilchem, Teramo) or Todd Hewitt (THY, Oxoid, Milano) supplemented with 0.5% Yeast Extract (Liophilchem). Solid media were blood agar plates (Tryptic soy agar, Difco) supplemented with 3% horse blood (Biotech, Grosseto). The colony morphology was checked on Todd-Hewitt agar plates containing 200 units/ml of catalase (Sigma-Aldrich, Milano, Italy) [53,54]. Antibiotics were used at the following concentrations: 1 mg/L erythromycin, 500 mg/L kanamycin, 100 mg/L spectinomycin and 500 mg/L streptomycin (all from Sigma-Aldrich).

### Phenotypic assays of *atpC*

The intracellular pH was determined by Nuclear magnetic resonance (NMR). In brief, 400 ml of mid log pneumococcal cells grown in Todd Hewitt broth were pelleted and mixed with 1 ml of sodium alginate 6% (w/v 0.9% NaCl). Mixture were extruded manually through 25G needle on a surface of 0.25 M CaCl<sub>2</sub> solution. The small drops were washed and transferred in the 10 mm NMR tube. NMR <sup>31</sup>P spectra were recorded on a Bruker DRX 600 instrument operating at 242.9 MHz. <sup>31</sup>P spectra were recorded with a 1.5 s repetition time and 45° flip angle. Line broadening of 10 Hz were applied before Fourier Transform. <sup>31</sup>P chemical shift were determined by comparison with external standard Trisodium trimetaphosphate at -20.80 ppm. Intracellular pH was determinate by P<sub>i</sub> (intracellular phosphate) chemical shift in phosphate-free perfusion model [55]. Active metabolism of pneumococci was confirmed by acidification of the extracellular medium during the experiment carried out at 37°C.

Growth profiles of wild type strains and ATPase mutants were assayed both in standard laboratory media and in defined media. Standard laboratory media included TSB (Liophilchem) and Todd-Hewitt broth supplemented with Yeast Extract (0.5%)

(Oxoid). Defined media were prepared in CAT medium by adding serial concentration of potassium phosphate buffer with different range of pH (6 to 8) and by adding several concentration of  $K_2HPO_4$  as source of salt. CAT medium was composed by: Casitone (10gr/l) (Becton Dickinson), Tryptone (10 gr/l) (Oxoid), Yeast Extract (1 gr/l) (Liophilchem), NaCl (5 gr/l) (Panreac, Milano, Italy), Catalase (200 U/ml) (Sigma-Aldrich) and Glucose (0.2%) (J.T. Baker, Milano, Italy). Metabolism of pneumococcal strains including wild type and ATPase mutants were assayed by Phenotype MicroArray (PM) microplate PM9 containing a total of 96 different osmolyte sources. PM technology measures active metabolism by recording the irreversible reduction of tetrazolium violet to formazan as an indirect evidence for NADH production. PM procedures were carried out as previously described (Viti C 2009). Quantitative colour change were recorded automatically every 15 min for a period of 72 h. Analyses were performed by the Omnilog-PM Software (Biolog, inc.) and data were filtered using average height as a parameter.

### Ethics statement

Animal experimentation in Italy is regulated by Decreto Legislativo 116/92 and Directive 210/63/EU. The animal protocol was approved by the "Comitato Etico Locale" of the Azienda Universitaria Ospedaliera Senese and received thereafter the relative project licence issued by the Italian Ministry of Health (193/2008-B).

### Mice

Six to seven-weeks old female CD1, BALB/c, and CBA/Ca mice were purchased from Charles River Italia (Lecco, Italy). For the bottleneck experiments, outbred CD1 mice were used, while BALB/c mice were chosen for both *in vivo* macrophage and neutrophil depletion and *ex vivo* experiments. CBA/Ca data are shown only for comparison of the dynamics of the early phases of infection. Animals were sacrificed by intraperitoneal (i.p.) injection of xylazine hydrochloride and zolazepam tiletamine cocktail (Xilor 2%, Bio 98 S.r.l., Bologna, Italy and Zoletil 20, Virbac S.r.l., Milano, Italy). Mice were kept at the animal facility of the LAMMB, University of Siena, according to its guidelines for the maintenance of laboratory animals [48,56–58]. Blood samples from mice were collected by sub-mandibular vein or cardiac puncture under terminal anaesthesia. To prevent blood coagulation, 100 U/ml of heparin (MS Pharma, Milano, Italy) was added. All the collected organs (spleen, lung, liver and kidney) were homogenized in 1 ml of TSB, and then frozen at  $-80^{\circ}C$  after making to 10% v/v of glycerol.

### Challenge experiments

Two series of experiments were performed in order to define the bottleneck for invasive pneumococcal infection with a total of 68 CD1 mice. Mice were challenged intravenously (i.v.) as described [48,56–58] with a mixture of the three isogenic TIGR4 derivatives (FP122, FP318 and FP321) at  $3.3 \times 10^5$  CFU each/mouse. At preset time points blood samples were collected and selected groups were sacrificed for obtainment of spleen samples. Two blood samples from each animal, taken at different time points, are reported in Figure 1. Bacteria were enumerated by plating on selective media. The dose of the experiment was decided after having observed in a preliminary experiment 5/8 mixed and 3/8 monoclonal infections using two pneumococcal clones at a dose of  $2 \times 10^6$  (data not shown).

A pilot experiment for comparison of virulence in CD1, BALB/c and CBA/Ca mice was carried out by infecting i.v. four mice each with a mixture of G54, D39 and TIGR4 ( $3 \times 10^5$  CFU each/mouse). Three blood samples per mouse were obtained.

For depletion of macrophages, BALB/c mice were treated 24 h prior to challenge by i.p. injection with 750  $\mu$ l of a suspension of clodronate (CL<sub>2</sub>MBP) liposomes. One control group received PBS-containing liposomes [31] and the other was untreated. Clodronate was encapsulated in liposomes, as described earlier [31] and was a gift of Roche Diagnostics (Mannheim, Germany). Neutrophil depletion was performed by a single i.p. injection of 150  $\mu$ g/mouse of anti-GR-1 antibody (Ly6G and Ly6C, clone RB8-8C5; Becton Dickinson) 24 h prior to infection [32,33]. Two control groups were either left untreated or administered with a rat isotype control antibody IgG2b K (kappa) (Becton Dickinson). Groups of mice depleted of macrophages or neutrophils were infected i.v. with  $1 \times 10^6$  CFU/mouse containing  $2.5 \times 10^3$  CFU of each TIGR4, D39, DP1004 and G54. Bacterial viable counts were determined at preset time points.

The virulence of the ATPase mutant FP487 (*atpC* mutant) was assayed in parallel with TIGR4. BALB/c mice (n=6) were infected with  $1 \times 10^6$  CFU/mouse i.v. and blood and spleen samples collected at 72 h.

### Macrophage phagocytosis

Spleen and bone marrow macrophages were isolated from mice using a modified protocol previously described [34]. Cells were cultured in medium supplemented with 25 ng/ml of recombinant M-CSF (Invitrogen) and re-seeded at day 7 at the concentration of  $2 \times 10^5$  cell/ml. After 24 h, 0.1 ml of pneumococci cultured to OD<sub>590</sub> 0.25 were added. After 45 min plates were washed and reincubated with 10 mg/L of penicillin and 200 mg/L of gentamicin for 30 min. Intracellular bacteria were enumerated after lysis with saponin 1%. Phagocytosis of RAW264.7 macrophages followed the same protocol, but in addition samples were reincubated after removal of the antibiotics for an additional hour in fresh medium.

### Flow cytometry analysis

Flow cytometric analysis was conducted on bacteria suspended in 1% v/v paraformaldehyde in PBS on a FACScalibur machine (Becton Dickinson, California, USA). To verify macrophage and neutrophil depletion, homogenised organ samples were washed in DMEM (Sigma-Aldrich) and non-specific binding was blocked with FcR blocking agent [59]. Cells were incubated 30 min with 1  $\mu$ g of specific fluorochrome-conjugated antibodies per  $10^6$  cells. Neutrophils were stained using a rat anti-GR-1 antibody (MACS, Bologna, Italy). Macrophages were detected with rat anti-F4/80 mAb (BM8 clone; Abcam, Milano, Italy), and a rat anti-mouse CD11b mAb (Becton-Dickinson). Surface markers of macrophages were analysed using the following antibodies: anti-F4/80 mAb, anti-mouse CD11b mAb, anti-CD11c mAb (eBioscience), anti-mouse SIGNR1/CD209b Ab, goat IgG control Ab, anti-mouse Siglec-1 mAb, rat IgG2A Isotype control Ab, anti-mouse MARCO mAb and rat IgG1 isotype control Ab (R&D Systems).

To assay for the presence of anti-pneumococcal antibodies in mouse sera, the four pneumococcal strains TIGR4, G54, D39 and DP1004 were blocked in PBS-BSA 1% v/v for 30 min at  $37^{\circ}C$  and incubated for 1 h at  $37^{\circ}C$  with sera (1:100) obtained from BALB/c mice and the positive anti-serotype 2 control serum (Staten Serum Institute, SSI, Copenhagen, DK). Samples were marked with anti-mouse IgG (1:64) or anti-rabbit IgG (1:160; Sigma-Aldrich).

### Ex vivo blood survival assay

In order to evaluate the capacity of whole blood to kill or inhibit the multiplication of pneumococci and to investigate the effect of specific antibodies, *ex vivo* experiments were set up. Blood from

BALB/c mice was collected into tubes containing heparin and infected with pneumococci. For the assay of opsono-phagocytosis of ATPase mutants  $1 \times 10^4$  CFU/ml of parental and ATPase mutant were inoculated in blood and incubated in rotation. The anti-type 4 serum (SSI) was used at 1:50 dilution. For the evaluation of growth of pneumococci in blood  $3 \times 10^5$  CFU/ml of G54, D39 and TIGR4 were inoculated in rotating blood. The efficacy of type 2 anti-serum (SSI) on D39 and its non-encapsulated derivative DP1004 was assayed as above using a inoculum of  $3 \times 10^5$  CFU/ml and a 1:100 dilution of the serum.

### Whole genome sequencing

Chromosomal DNA was extracted using the High Pure PCR Template preparation kit (Roche). Whole genome sequencing was performed by the Institute of Applied Genomics and IGA Technology Services srl (University of Udine, Italy) using an Illumina (Solexa) Genome Analyzer II platform [60]. Reads of both, parent and mutant strains, were aligned to the reference genome of TIGR4 (accession NC\_003028) using the Mosaik Assembler suite (The MarthLab, Boston College, Massachusetts, USA). Single nucleotide polymorphisms (SNPs), insertions and deletions (INDELs) were retrieved with VarScan software [61]. SNPs and INDELs of the challenge strains were subtracted from those found by aligning the blood isolates. All F1/F0 ATPase mutations were re-sequenced by the Sanger method and deposited in GenBank (accession KF705516 to KF705525).

### Statistical analysis

In order to evaluate the number of bacteria at the origin of blood infection, a model derived from that previously described [23], was developed. A full description of the statistical model is given in the supplementary materials. Statistical analysis of bacterial counts in blood and organs was performed by the Student's *t*-test for data reported in Figures 3, 4, S2 and S3. The analysis of different bacterial blood clearance at 5 and 30 min and the differences in bacterial phagocytosis and data of phenotype microarray were performed using Kruskal-Wallis and Dunn's multiple comparison post test (Figure 2 C–F and S5). Values of  $P < 0.05$  were considered statistically significant. The Fluorescence Index (Figure S3 K) was calculated by multiplying the percentage of positive events with the geometric mean fluorescence intensity (GeoMean).

### Supporting Information

**Figure S1 Paired spleen and blood counts of mice from Figure 1.** Blood (black) and spleen counts (white) of single mice ( $n = 12$ ) at 24 h (A), 48 h (B) and 72 h (C) after i.v. challenge with a mixture of three isogenic *S. pneumoniae* TIGR4 variants ( $3 \times 10^5$  CFU/each strain). Data are from a subset of mice shown in Figure 1.  
(PDF)

**Figure S2 Bacterial counts in organs of BALB/c mice depleted of neutrophils or macrophages (the data for blood and spleen are those in Figure 3).** A mixture of four different pneumococcal strain (TIGR4, D39, DP1004 and G54) were injected i.v. in BALB/c mice at the challenge dose of  $2.5 \times 10^5$  CFU/each strain ( $1 \times 10^6$  CFU/mouse). Bacterial counts in blood and organs over time are reported for untreated mice (A1, A2, A3 and A4), clodronate liposomes treated mice (B1, B2, B3 and B4) and anti-GR-1 mAb treated mice (C1, C2, C3 and C4). Blood cultures are shown with red lines, while CFU

counts in the spleen, lung, liver and kidney are shown as blue, yellow, green and pink lines respectively. All samples were collected at different time points for 13 h, with the exception of mice treated with clodronate (8 h). Every organ was homogenized in 1 ml of medium and CFU/ml refers to counts for the whole organ. Data are reported as the mean  $\pm$  SD of bacterial counts ( $n = 3-9$ ).

(PDF)

**Figure S3 Control experiments for cell depletion *in vivo*, serum antibodies and phagocytosis in BALB/c mice.** BALB/c mice were infected by the i.v. route with a mixture of four different strains of *S. pneumoniae*: TIGR4 (green), D39 (fill red circles), DP1004 (open red circles) and G54 (blue) at the challenge dose of  $2.5 \times 10^5$  CFU/each strain (total  $1 \times 10^6$  CFU/mouse). Bacterial blood counts at different time point are reported for infected mice treated with clodronate liposomes (A), PBS liposomes (B), anti-GR1 mAb (E), isotype control rat IgG2b,k (F) and untreated mice (C and G). Data are represented as the mean  $\pm$  SD of blood bacterial counts of three mice. Macrophage depletion (D) and neutrophil depletion (H) were confirmed by flow cytometry analysis with specific antibodies: anti-F4/80 and anti-CD11b for macrophage in the spleen and liver (D) and anti-GR-1 for neutrophil (H). Mean  $\pm$  SD of triplicate of independent experiments are shown. (I) Growth of D39 (red), TIGR4 (green) and G54 (blue) pneumococcal strains in rotated fresh blood from BALB/c mice. A representative experiment is reported. (J) Effect of anti-capsular serotype 2 serum (1:100) to survival of  $3 \times 10^5$  CFU/ml of D39 (red bar) and its non-encapsulated derivative DP1004 (open bar) in mouse blood incubated for 1 h. Mean  $\pm$  SD of three independent experiments are reported and statistical analysis is performed by Student's *t*-test. (K) Binding of anti-type 2 specific antibody (1:100) to whole pneumococci TIGR4 (green bar), D39 (red bar), G54 (blue bar) and rough DP1004 (red open bar) after 1 h incubation at 37°C. No binding was observed with non-immunized serum (1:100) from naive BALB/c mice. Data are represented as FI  $\pm$  SEM of three independent experiments.

(PDF)

**Figure S4 Phagocytosis and surface marker characterization of different type of macrophages.** Adhesion (A) and invasion (phagocytosis) (B) of four different pneumococcal strains (G54, TIGR4, D39 and DP1004) in primary spleen macrophages (SPM) isolates from C57BL/6 mice. Each symbol indicates a single value and results are represented as mean  $\pm$  SD ( $n = 3$ ). (C) Cytofluorimetric analysis of surface markers of spleen macrophages from C57BL/6 mice. A representative experiment was reported. Invasion of different pneumococci (G54, TIGR4, D39 and DP1004) in bone marrow macrophages (BMM) isolates from BALB/c mice (D) and in RAW264.7 macrophage cell line (F). Data ( $n = 6-12$ ) are reported as scatter plots to better evidence the number of negative assay. Dashed lines indicate the detection limits for positive samples. Relative analysis of surface marker expression of bone marrow macrophages (E) and RAW264.7 (G) by flow cytometry. Data are represented as per cent of positive cells of representative experiments.

(PDF)

**Figure S5 Phenotype MicroArray of pneumococcal strains.** Osmotic resistance of pneumococcal strains determined by Phenotype MicroArray. Bacterial metabolic activity determined in ethylene glycol (A), sodium nitrate (B) and sodium phosphate (C). Data were filtered using average height as a parameter (Biolog Omnilog-PM software). TIGR4 and the two

TIGR4 derived challenge strains are in green, D39 in red and the mutants in black.

(PDF)

**Table S1 Distribution of TIGR4 variants in monoclonal blood cultures.**

(PDF)

**Text S1 Model to establish the number of invading bacteria.** Here we construct a statistical model to determine by which of two ways bacteraemia was generated.

(PDF)

## References

- Gray BM, Converse GM, Dillon HCJ (1980) Epidemiologic studies of *Streptococcus pneumoniae* in infants: acquisition, carriage, and infection during the first 24 months of life. *J Infect Dis* 142: 923–933.
- Hogberg L, Geli P, Ringberg H, Melander E, Lipsitch M, et al., (2007) Age- and serogroup-related differences in observed durations of nasopharyngeal carriage of penicillin-resistant pneumococci. *J Clin Microbiol* 45: 948–952.
- Melegaro A, Edmunds WJ, Pebody R, Miller E, George R (2006) The current burden of pneumococcal disease in England and Wales. *Journal of Infection* 52: 37–48.
- Ispahani P, Slack RCB, Donald FE, Weston WC, Rutter N (2004) Twenty year surveillance of invasive pneumococcal disease in Nottingham: serogroups responsible and implications for immunisation. *Arch Dis Child* 89: 757–762.
- Rudan I, Boschi-Pinto C, Mulholland K, Campbell H (2008) Epidemiology and etiology of childhood pneumoniae. *Bull World Health Organ* 86: 408–416.
- Kadioglu A, Weiser JN, Paton JC, Andrew PW (2008) The role of *Streptococcus pneumoniae* virulence factors in host respiratory colonization and disease. *Nat Rev Microbiol* 6: 288–301.
- Chiavolini D, Pozzi G, Ricci S (2008) Animal models of *Streptococcus pneumoniae* disease. *Clin Microbiol Rev* 21: 666–685.
- Wright DH (1927) Experimental pneumococcal septicaemia and anti-pneumococcal immunity. *The Journal of Pathology and Bacteriology* 30: 185–252.
- Rogers DE, Melly MA (1957) Studies on bacteremia II. Further observations on the granulocytopenia induced by the intravenous injection of staphylococci. *J Exp Med* 105: 99–112.
- Rogers DE (1960) Host mechanisms which act to remove bacteria from the blood stream. *Bacteriol Rev* 24: 50–66.
- Hosea SW, Brown EJ, Frank MM (1980) The critical role of complement in experimental pneumococcal sepsis. *J Infect Dis* 142: 903–909.
- Hosea SW, Brown EJ, Hammer CH, Frank MM (1980) Role of complement activation in a model of adult respiratory distress syndrome. *J Clin Invest* 66: 375–382.
- Van Wyck DB, Witte MH, Witte CL (1982) Synergism between the spleen and serum complement in experimental pneumococemia. *J Infect Dis* 145: 514–519.
- Brown EJ, Hosea SW, Frank MM (1983) The role of antibody and complement in the reticuloendothelial clearance of pneumococci from the bloodstream. *Rev Infect Dis* 5: 797–805.
- Levin BR, Antia R (2001) Why we don't get sick: the within-host population dynamics of bacterial infections. *Science* 292: 1112–1115.
- Grant JA, Restif O, McKinley JT, Sheppard M, Maskell DJ, et al., (2008) Modelling within-host spatiotemporal dynamics of invasive bacterial disease. *PLOS Biology* 6: 757–770.
- Meynell GG, Maw J (1968) Evidence for a two-stage model of microbial infection. *J Hyg (London)* 66: 273–280.
- Sheppard M, Webb C, Heath F, Mallows V, Emilianus R, et al., (2003) Dynamics of bacterial growth and distribution within the liver during *Salmonella* infection. *Cell Microbiol* 5: 593–600. 296 [pii].
- Sacristan S, Malpica JM, Fraile A, Garcia-Arenal F (2003) Estimation of population bottlenecks during systemic movement of tobacco mosaic virus in tobacco plants. *J Virol* 77: 9906–9911.
- Barnes PD, Bergman MA, Mecasas J, Isberg RR (2006) *Yersinia pseudotuberculosis* disseminates directly from a replicating bacterial pool in the intestine. *J Exp Med* 203: 1591–1601.
- Brown SP, Cornell SJ, Sheppard M, Grant AJ, Maskell DJ, et al., (2006) Intracellular demography and the dynamics of *Salmonella enterica* infections. *PLoS Biol* 4: e349.
- Meynell GG, Stocker BAD (1957) Some hypotheses on the aetiology of fatal infections in partially resistant hosts and their application to mice challenged with *Salmonella paratyphi-B* or *Salmonella typhimurium* by intraperitoneal injection. *J Gen Microbiol* 16: 58.
- Margolis E, Levin BR (2007) Within-host evolution for the invasiveness of commensal bacteria: an experimental study of bacteremias resulting from *Haemophilus influenzae* nasal carriage. *J Infect Dis* 196: 1068–1075.
- Meynell GG (1957) The applicability of the hypothesis of independent action to fatal infections in mice given *Salmonella typhimurium* by mouth. *J Gen Microbiol* 16: 396–404.
- Moxon ER, Murphy PA (1978) *Haemophilus influenzae* bacteremia and meningitis resulting from survival of a single organism. *Proc Natl Acad Sci USA* 75: 1534–1536.
- Plunschke G, Mercer A, Kusecek B, Pohl A, Achtman M (1983) Induction of bacteremia in newborn rats *Escherichia coli* K1 is correlated with only certain O (lipopolysaccharide) antigen type. *Infect Immun* 39: 599–607.
- Rubin LG (1987) Bacterial colonization and resulting from multiplication of a single organism. *Reviews of Infectious Diseases* 9: 488–493.
- Oggioni MR, Memmi G, Maggi T, Chiavolini D, Iannelli F, et al., (2003) Pneumococcal zinc metalloproteinase ZmpC cleaves human matrix metalloproteinase 9 and is a virulence factor in experimental pneumonia. *Mol Microbiol* 49: 795–805.
- Weiser JN, Austrian R, Sreenivasan PK, Masure HR (1994) Phase variation in pneumococcal opacity: relationship between colonial morphology and nasopharyngeal colonization. *Infect Immun* 62: 2582–2589.
- Ripoll VM, Kadioglu A, Cox R, Hume DA, Denny P (2010) Macrophages from BALB/c and CBA/Ca mice differ in their cellular responses to *Streptococcus pneumoniae*. *J Leukoc Biol* 87: 735–741.
- van Rooijen N, Sanders A (1994) Liposome mediated depletion of macrophages: mechanism of action, preparation of liposomes and applications. *J Immunol Methods* 174: 83–93.
- Fleming TJ, Fleming ML, Malek TR (1993) Selective expression of Ly-6G on myeloid lineage cells in mouse bone marrow. RB6-8C5 mAb to granulocyte-differentiation antigen (Gr-1) detects members of the Ly-6 family. *J Immunol* 151: 2399–2408.
- Daley JM, Thomay AA, Connolly MD, Reichner SJ, Albina JE (2008) Use of Ly6G-specific monoclonal antibody to deplete neutrophils in mice. *Journal of Leukocyte Biology* 83: 64–70.
- Alatery A, Basta S (2008) An efficient culture method for generating large quantities of mature mouse splenic macrophages. *J Immunol Methods* 338: 47–57.
- Brown EJ, Hosea SW, Frank MM (1981) The role of complement in the localisation of pneumococci in the splenic reticuloendothelial system during experimental bacteremia. *The Journal of Immunology* 126: 2230–2234.
- Brown EJ, Hosea SW, Frank MM (1981) The role of the spleen in experimental pneumococcal bacteremia. *J Clin Invest* 67: 975–982.
- Shortley G, Wilkins JR (1965) Independent-action and birth-death models in experimental microbiology. *Bacteriol Rev* 29: 102–141.
- stevens KE, Sebert ME (2011) Frequent beneficial mutations during single-colony serial transfer of *Streptococcus pneumoniae*. *Plos Genet* 7: e1002232.
- Pericone CD, Bae D, Shchepetov M, McCool T, Weiser JN (2002) Short-sequence tandem and nontandem DNA repeats and endogenous hydrogen peroxide production contribute to genetic instability of *Streptococcus pneumoniae*. *J Bacteriol* 184: 4392–4399.
- Munoz R, Garcia E, de la Campa AG (1996) Quinine specifically inhibits the proteolipid subunit of the F0F1 H<sup>+</sup>-ATPase of *Streptococcus pneumoniae*. *J Bacteriol* 178: 2455–2458.
- Pikis A, Campos JM, Rodriguez WJ, Keith JM (2001) Optochin resistance in *Streptococcus pneumoniae*: mechanism, significance, and clinical implications. *J Infect Dis* 184: 582–590.
- Martin-Galiano AJ, Gorgojo B, Kunin CM, de la Campa AG (2002) Mefloquine and new related compounds target the F(0) complex of the F(0)F(1) H<sup>+</sup>-ATPase of *Streptococcus pneumoniae*. *Antimicrob Agents Chemother* 46: 1680–1687.
- Dias CA, Agnes G, Frazzon AP, Kruger FD, d'Azevedo PA et al., (2007) Diversity of mutations in the atpC gene coding for the c Subunit of F0F1 ATPase in clinical isolates of optochin-resistant *Streptococcus pneumoniae* from Brazil. *J Clin Microbiol* 45: 3065–3067.
- Nunes S, Sà-Leão R, De Lencastre H (2008) Optochin resistance among *Streptococcus pneumoniae* strains colonizing healthy children in Portugal. *J Clin Microbiol* 46: 321–324.
- Krulwich TA, Sachs G, Padan E (2011) Molecular aspects of bacterial pH sensing and homeostasis. *Nat Rev Microbiol* 9: 330–343. nrmicro2549 [pii];10.1038/nrmicro2549 [doi].
- Lee EJ, Pontes MH, Groisman EA (2013) A bacterial virulence protein promotes pathogenicity by inhibiting the bacterium's own F1F0 ATP synthase. *Cell* 154: 146–156.

## Acknowledgments

The authors are very thankful to Elisa Margolis, Jeremy Levesley and Andrey Morozov for discussion of the statistical approach and to Hasan Yesilkaya for the spectinomycin resistant D39 derivative.

## Author Contributions

Conceived and designed the experiments: AG LC LF AP AV GP PWA UK ERM MRO. Performed the experiments: AG LC LF ASM BW TB AP MT NvR. Analyzed the data: AG LC LF AP BW AV GP SR PWA UK ERM MRO. Contributed reagents/materials/analysis tools: NvR. Wrote the paper: AG PWA SR UK ERM MRO.

47. Croucher NJ, Mitchell AM, Gould KA, Inverarity D, Barquist L, et al., (2013) Dominant role of nucleotide substitution in the diversification of serotype 3 pneumococci over decades and during a single infection. *PLoS Genet* 9: e1003868.
48. Chiavolini D, Memmi G, Maggi T, Iannelli F, Pozzi G, et al., (2003) The three extra-cellular zinc metalloproteinases of *Streptococcus pneumoniae* have a different impact on virulence in mice. *BMC Microbiol* 3: 14.
49. Pozzi G, Masala L, Iannelli F, Manganelli R, Havarstein LS, et al., (1996) Competence for genetic transformation in encapsulated strains of *Streptococcus pneumoniae*: two allelic variants of the peptide pheromone. *J Bacteriol* 178: 6087–6090.
50. Dopazo J, Mendoza A, Herrero J, Caldara F, Humbert Y, et al., (2001) Annotated draft genomic sequence from *Streptococcus pneumoniae* type 19F clinical isolate. *Microb Drug Resist* 7: 99–125.
51. Pozzi G, Musmanno RA, Renzoni EA, Oggioni MR, Cusi MG (1988) Host-vector system for integration of recombinant DNA into chromosomes of transformable and nontransformable streptococci. *J Bacteriol* 170: 1969–1972.
52. Iannelli F, Chiavolini D, Ricci S, Oggioni MR, Pozzi G (2004) Pneumococcal surface protein C contributes to sepsis caused by *Streptococcus pneumoniae* in mice. *Infect Immun* 72: 3077–3080.
53. Bidossi A, Mulas L, Decorosi F, Colomba L, Ricci S, et al., (2012) A functional genomics approach to establish the complement of carbohydrate transporters in *Streptococcus pneumoniae*. *PLoS ONE* 7: e33320.
54. Trappetti C, Ogunniyi AD, Oggioni MR, Paton JC (2011) Extracellular matrix formation enhances the ability of *Streptococcus pneumoniae* to cause invasive disease. *PLoS ONE* 6: e19844.
55. Ben-Horin H, Tassini M, Vivi A, Navon G, Kaplan O (1995) Mechanism of action of the antineoplastic drug lonidamine: 31P and 13C nuclear magnetic resonance studies. *Cancer Res* 55: 2814–2821.
56. Kadioglu A, Cuppone AM, Trappetti C, List T, Spreafico A, et al., (2011) Sex-based differences in susceptibility to respiratory and systemic pneumococcal disease in mice. *J Infect Dis* 204: 1971–1979.
57. Oggioni MR, Iannelli F, Ricci S, Chiavolini D, Parigi R, et al., (2004) Antibacterial activity of a competence-stimulating peptide in experimental sepsis caused by *Streptococcus pneumoniae*. *Antimicrob Agents Chemother* 48: 4725–4732.
58. Oggioni MR, Trappetti C, Kadioglu A, Cassone M, Iannelli F, et al., (2006) Switch from planktonic to sessile life: a major event in pneumococcal pathogenesis. *Mol Microbiol* 61: 1196–1210.
59. Ciabattini A, Pettini E, Andersen P, Pozzi G, Medaglini D (2008) Primary activation of antigen-specific naive CD4<sup>+</sup> and CD8<sup>+</sup> T cells following intranasal vaccination with recombinant bacteria. *Infect Immun* 76: 5817–5825.
60. Zhou X, Ren L, Meng Q, Li Y, Yu Y, et al., (2010) The next-generation sequencing technology and application. *Protein Cell* 1: 520–536.
61. Koboldt DC, Zhang Q, Larson DE, Shen D, McLellan MD, et al., (2012) VarScan 2: somatic mutation and copy number alteration discovery in cancer by exome sequencing. *Genome Res* 22: 568–576.
62. Lanic JA, Ng WL, Kazmierczak KM, Andrzejewski TM, Davidsen TM, et al., (2007) Genome sequence of Avery's virulent serotype 2 strain D39 of *Streptococcus pneumoniae* and comparison with that of unencapsulated laboratory strain R6. *J Bacteriol* 189: 38–51.
63. Tettelin H, Nelson KE, Paulsen IT, Eisen JA, Read TD, et al., (2001) Complete genome sequence of a virulent isolate of *Streptococcus pneumoniae*. *Science* 293: 498–506.
